# Supplementary material for: The impact of the COVID-19 pandemic on scientific research in the life sciences
Source: PubMed Central journal article supplement (PMC8827464; doi:10.1371/journal.pone.0263001), 2022-02-09
Supplement: pone.0263001.s001.pdf [file pone.0263001.s001.pdf]

Supplementary material for the paper:  
The impact of the COVID-19 pandemic on scientific research in the life  
sciences

January 21, 2022

Table S 1: **Common trend assumption (CTA) Regression Table.** Full Regression table with all controls and interactions.

|         | (1)<br>ln(Papers)     | (2)<br>ln(Impact)     | (3)<br>ln(PMC)        | (4)<br>ln(Trials)     | (5)<br>ln(Grants)     | (6)<br>ln(Old Grants) |
|---------|-----------------------|-----------------------|-----------------------|-----------------------|-----------------------|-----------------------|
| 2019-03 | -0.001<br>(-0.41)     | -0.007<br>(-1.51)     | -0.032***<br>(-10.32) | -0.019***<br>(-4.72)  | -0.029***<br>(-9.40)  | -0.022***<br>(-7.12)  |
| 2019-03 | 0.024***<br>(8.29)    | 0.011*<br>(2.40)      | 0.005<br>(1.76)       | 0.004<br>(1.09)       | -0.030***<br>(-9.58)  | -0.033***<br>(-10.69) |
| 2019-04 | -0.004<br>(-1.30)     | -0.023***<br>(-4.89)  | -0.014***<br>(-4.60)  | -0.031***<br>(-7.87)  | -0.023***<br>(-7.48)  | -0.018***<br>(-5.85)  |
| 2019-05 | -0.018***<br>(-6.34)  | -0.022***<br>(-4.78)  | -0.005<br>(-1.56)     | 0.017***<br>(4.31)    | -0.016***<br>(-5.19)  | -0.025***<br>(-8.24)  |
| 2019-06 | 0.031***<br>(10.54)   | -0.014**<br>(-3.04)   | 0.001<br>(0.37)       | -0.003<br>(-0.74)     | -0.023***<br>(-7.39)  | -0.037***<br>(-11.92) |
| 2019-07 | -0.009**<br>(-3.12)   | -0.023***<br>(-4.81)  | 0.015***<br>(4.86)    | 0.015***<br>(3.85)    | -0.023***<br>(-7.49)  | -0.035***<br>(-11.26) |
| 2019-08 | -0.002<br>(-0.70)     | -0.028***<br>(-5.86)  | -0.010**<br>(-3.05)   | -0.016***<br>(-4.06)  | -0.033***<br>(-10.52) | -0.046***<br>(-14.97) |
| 2019-09 | 0.017***<br>(5.90)    | -0.015**<br>(-3.12)   | -0.010**<br>(-3.13)   | -0.014***<br>(-3.65)  | -0.053***<br>(-17.02) | -0.073***<br>(-23.64) |
| 2019-10 | 0.038***<br>(13.19)   | 0.022***<br>(4.83)    | 0.032***<br>(10.35)   | -0.025***<br>(-6.19)  | -0.009**<br>(-3.02)   | -0.040***<br>(-12.88) |
| 2019-11 | -0.003<br>(-1.10)     | -0.009*<br>(-1.98)    | 0.032***<br>(10.29)   | -0.039***<br>(-9.79)  | -0.017***<br>(-5.33)  | -0.064***<br>(-20.80) |
| 2019-12 | 0.094***<br>(32.00)   | 0.037***<br>(8.06)    | 0.126***<br>(39.21)   | -0.020***<br>(-5.03)  | 0.004<br>(1.35)       | -0.049***<br>(-15.79) |
| 2020-01 | -0.056***<br>(-18.39) | -0.062***<br>(-12.75) | -0.034***<br>(-10.47) | -0.080***<br>(-20.01) | -0.046***<br>(-14.28) | -0.108***<br>(-33.69) |
| 2020-02 | -0.093***<br>(-29.85) | -0.113***<br>(-23.12) | -0.072***<br>(-21.85) | -0.105***<br>(-26.06) | -0.077***<br>(-23.69) | -0.147***<br>(-45.46) |
| 2020-03 | -0.121***<br>(-37.45) | -0.146***<br>(-29.29) | -0.069***<br>(-20.33) | -0.153***<br>(-36.88) | -0.110***<br>(-32.68) | -0.177***<br>(-53.00) |
| 2020-04 | -0.206***<br>(-59.90) | -0.249***<br>(-47.87) | -0.161***<br>(-44.64) | -0.177***<br>(-41.43) | -0.187***<br>(-52.39) | -0.247***<br>(-70.53) |
| 2020-05 | -0.303***<br>(-84.07) | -0.352***<br>(-65.94) | -0.210***<br>(-55.94) | -0.240***<br>(-54.85) | -0.240***<br>(-63.99) | -0.297***<br>(-80.55) |

|                          |                       |                       |                       |                       |                       |                       |
|--------------------------|-----------------------|-----------------------|-----------------------|-----------------------|-----------------------|-----------------------|
| 2020-06                  | -0.243***<br>(-62.33) | -0.323***<br>(-58.38) | -0.117***<br>(-30.06) | -0.248***<br>(-55.86) | -0.232***<br>(-60.38) | -0.294***<br>(-79.10) |
| 2020-07                  | -0.280***<br>(-72.11) | -0.343***<br>(-61.31) | -0.141***<br>(-35.81) | -0.286***<br>(-62.75) | -0.231***<br>(-59.39) | -0.299***<br>(-78.76) |
| 2020-08                  | -0.330***<br>(-80.45) | -0.413***<br>(-72.08) | -0.199***<br>(-48.01) | -0.321***<br>(-67.97) | -0.279***<br>(-68.10) | -0.351***<br>(-88.07) |
| 2020-09                  | -0.261***<br>(-62.18) | -0.348***<br>(-59.68) | -0.147***<br>(-35.28) | -0.303***<br>(-65.03) | -0.252***<br>(-60.64) | -0.338***<br>(-83.50) |
| 2020-10                  | -0.175***<br>(-44.50) | -0.229***<br>(-40.85) | 0.008*<br>(2.23)      | -0.315***<br>(-68.44) | -0.137***<br>(-36.63) | -0.271***<br>(-72.35) |
| 2020-11                  | -0.172***<br>(-42.62) | -0.204***<br>(-35.23) | -0.018***<br>(-4.88)  | -0.312***<br>(-67.63) | -0.141***<br>(-36.89) | -0.290***<br>(-76.78) |
| 2020-12                  | -0.107***<br>(-25.85) | -0.185***<br>(-31.95) | 0.043***<br>(10.93)   | -0.276***<br>(-61.49) | -0.142***<br>(-36.54) | -0.266***<br>(-69.51) |
| 20% ≤ σ ≤ 80%            | 0.249***<br>(3.67)    | 0.151<br>(1.93)       | 0.276***<br>(4.53)    | 0.113**<br>(2.66)     | 0.198***<br>(3.49)    | 0.241***<br>(4.45)    |
| 80% ≤ σ ≤ 100%           | -0.991***<br>(-4.55)  | -1.282***<br>(-4.79)  | -0.510**<br>(-2.58)   | -0.274*<br>(-2.38)    | -0.557**<br>(-3.27)   | -0.476**<br>(-2.99)   |
| 2019-02 × 20% ≤ σ ≤ 80%  | -0.047***<br>(-3.34)  | -0.032<br>(-1.40)     | -0.029*<br>(-2.01)    | -0.031<br>(-1.54)     | -0.015<br>(-1.03)     | 0.005<br>(0.35)       |
| 2019-02 × 80% ≤ σ ≤ 100% | -0.186***<br>(-4.57)  | -0.161*<br>(-2.19)    | -0.116*<br>(-2.55)    | -0.101<br>(-1.80)     | -0.175***<br>(-3.47)  | -0.123**<br>(-2.84)   |
| 2019-03 × 20% ≤ σ ≤ 80%  | -0.026<br>(-1.87)     | -0.046*<br>(-2.05)    | -0.008<br>(-0.56)     | 0.095***<br>(4.47)    | -0.007<br>(-0.48)     | 0.013<br>(0.92)       |
| 2019-03 × 80% ≤ σ ≤ 100% | -0.068<br>(-1.58)     | -0.100<br>(-1.21)     | -0.063<br>(-1.46)     | -0.039<br>(-0.58)     | -0.021<br>(-0.52)     | 0.028<br>(0.61)       |
| 2019-04 × 20% ≤ σ ≤ 80%  | -0.017<br>(-1.21)     | -0.035<br>(-1.48)     | -0.013<br>(-0.92)     | 0.059**<br>(2.90)     | -0.016<br>(-1.10)     | -0.005<br>(-0.36)     |
| 2019-04 × 80% ≤ σ ≤ 100% | -0.057<br>(-1.17)     | -0.054<br>(-0.69)     | -0.070<br>(-1.57)     | 0.092*<br>(1.99)      | -0.234***<br>(-4.19)  | -0.233***<br>(-3.82)  |
| 2019-05 × 20% ≤ σ ≤ 80%  | -0.030*<br>(-2.24)    | -0.040<br>(-1.77)     | -0.008<br>(-0.53)     | 0.086***<br>(4.03)    | -0.033*<br>(-2.28)    | -0.018<br>(-1.19)     |
| 2019-05 × 80% ≤ σ ≤ 100% | -0.112*<br>(-2.19)    | -0.156<br>(-1.85)     | -0.101<br>(-1.81)     | -0.060<br>(-0.84)     | -0.087<br>(-1.80)     | -0.101*<br>(-2.53)    |
| 2019-06 × 20% ≤ σ ≤ 80%  | -0.020<br>(-1.37)     | -0.020<br>(-0.84)     | 0.001<br>(0.07)       | -0.033<br>(-1.47)     | 0.027<br>(1.72)       | 0.037*<br>(2.32)      |
| 2019-06 × 80% ≤ σ ≤ 100% | -0.035<br>(-0.69)     | 0.007<br>(0.09)       | -0.036<br>(-0.61)     | -0.009<br>(-0.19)     | -0.006<br>(-0.10)     | -0.001<br>(-0.01)     |
| 2019-07 × 20% ≤ σ ≤ 80%  | -0.035*<br>(-2.52)    | -0.026<br>(-1.17)     | -0.012<br>(-0.78)     | 0.029<br>(1.43)       | -0.013<br>(-0.85)     | 0.001<br>(0.05)       |
| 2019-07 × 80% ≤ σ ≤ 100% | -0.208***<br>(-4.11)  | -0.301***<br>(-3.84)  | -0.176***<br>(-3.50)  | 0.092<br>(1.62)       | -0.075<br>(-1.51)     | -0.010<br>(-0.21)     |
| 2019-08 × 20% ≤ σ ≤ 80%  | -0.005<br>(-0.34)     | -0.003<br>(-0.13)     | -0.000<br>(-0.01)     | 0.089***<br>(4.10)    | 0.005<br>(0.35)       | 0.002<br>(0.10)       |
| 2019-08 × 80% ≤ σ ≤ 100% | -0.168**<br>(-3.13)   | -0.235*<br>(-2.57)    | -0.185***<br>(-3.34)  | -0.023<br>(-0.36)     | -0.156**<br>(-2.64)   | -0.236***<br>(-3.48)  |
| 2019-09 × 20% ≤ σ ≤ 80%  | -0.000<br>(-0.01)     | 0.026<br>(1.17)       | -0.004<br>(-0.29)     | 0.041*<br>(2.02)      | 0.027<br>(1.71)       | 0.019<br>(1.17)       |
| 2019-09 × 80% ≤ σ ≤ 100% | -0.041                | 0.043                 | -0.007                | 0.124                 | 0.051                 | 0.157*                |

|                          |                      |                     |                     |                    |                      |                      |
|--------------------------|----------------------|---------------------|---------------------|--------------------|----------------------|----------------------|
|                          | (-0.68)              | (0.45)              | (-0.13)             | (1.91)             | (0.87)               | (2.55)               |
| 2019-10 × 20% ≤ σ ≤ 80%  | -0.019<br>(-1.34)    | -0.013<br>(-0.55)   | -0.034*<br>(-2.26)  | 0.044*<br>(2.15)   | -0.003<br>(-0.17)    | 0.024<br>(1.58)      |
| 2019-10 × 80% ≤ σ ≤ 100% | -0.018<br>(-0.39)    | -0.052<br>(-0.80)   | -0.069<br>(-1.59)   | -0.026<br>(-0.42)  | -0.005<br>(-0.15)    | 0.040<br>(0.91)      |
| 2019-11 × 20% ≤ σ ≤ 80%  | -0.035*<br>(-2.56)   | -0.049*<br>(-2.15)  | -0.045**<br>(-3.06) | 0.009<br>(0.43)    | -0.051***<br>(-3.40) | -0.054***<br>(-3.52) |
| 2019-11 × 80% ≤ σ ≤ 100% | -0.010<br>(-0.14)    | -0.028<br>(-0.26)   | -0.011<br>(-0.14)   | 0.036<br>(0.70)    | -0.036<br>(-0.63)    | -0.048<br>(-0.87)    |
| 2019-12 × 20% ≤ σ ≤ 80%  | -0.020<br>(-1.38)    | -0.034<br>(-1.51)   | -0.040*<br>(-2.49)  | -0.020<br>(-1.02)  | 0.002<br>(0.10)      | -0.002<br>(-0.10)    |
| 2019-12 × 80% ≤ σ ≤ 100% | -0.037<br>(-0.54)    | -0.054<br>(-0.56)   | -0.083<br>(-1.27)   | -0.135*<br>(-2.20) | -0.013<br>(-0.23)    | 0.101<br>(1.69)      |
| 2020-01 × 20% ≤ σ ≤ 80%  | -0.070***<br>(-4.81) | -0.050*<br>(-2.03)  | -0.047**<br>(-3.13) | 0.007<br>(0.31)    | -0.038*<br>(-2.35)   | -0.031<br>(-1.93)    |
| 2020-01 × 80% ≤ σ ≤ 100% | 0.272**<br>(2.75)    | 0.301*<br>(2.20)    | 0.250**<br>(2.69)   | -0.066<br>(-1.06)  | 0.142*<br>(1.99)     | 0.104<br>(1.54)      |
| 2020-02 × 20% ≤ σ ≤ 80%  | -0.060***<br>(-3.97) | -0.030<br>(-1.26)   | -0.025<br>(-1.60)   | 0.013<br>(0.57)    | -0.018<br>(-1.13)    | -0.005<br>(-0.29)    |
| 2020-02 × 80% ≤ σ ≤ 100% | 0.535***<br>(4.21)   | 0.704***<br>(4.43)  | 0.452***<br>(3.71)  | 0.047<br>(0.75)    | 0.223*<br>(2.46)     | 0.243**<br>(3.08)    |
| 2020-03 × 20% ≤ σ ≤ 80%  | -0.062***<br>(-3.77) | -0.049*<br>(-1.98)  | -0.036*<br>(-2.16)  | -0.052*<br>(-2.41) | -0.047**<br>(-2.73)  | -0.048**<br>(-2.76)  |
| 2020-03 × 80% ≤ σ ≤ 100% | 0.979***<br>(6.25)   | 1.120***<br>(5.80)  | 0.849***<br>(6.06)  | -0.065<br>(-1.24)  | 0.569***<br>(5.43)   | 0.447***<br>(5.00)   |
| 2020-04 × 20% ≤ σ ≤ 80%  | -0.001<br>(-0.06)    | 0.013<br>(0.50)     | 0.050**<br>(2.77)   | -0.005<br>(-0.23)  | -0.019<br>(-1.08)    | -0.032<br>(-1.71)    |
| 2020-04 × 80% ≤ σ ≤ 100% | 1.505***<br>(7.87)   | 1.627***<br>(7.38)  | 1.423***<br>(8.05)  | 0.406***<br>(5.33) | 0.917***<br>(6.75)   | 0.745***<br>(6.07)   |
| 2020-05 × 20% ≤ σ ≤ 80%  | 0.105***<br>(5.47)   | 0.176***<br>(6.47)  | 0.220***<br>(11.04) | 0.027<br>(1.18)    | 0.028<br>(1.50)      | -0.003<br>(-0.17)    |
| 2020-05 × 80% ≤ σ ≤ 100% | 1.903***<br>(9.04)   | 2.223***<br>(9.34)  | 1.849***<br>(9.19)  | 0.357***<br>(5.53) | 1.229***<br>(8.10)   | 1.154***<br>(8.21)   |
| 2020-06 × 20% ≤ σ ≤ 80%  | 0.224***<br>(10.68)  | 0.267***<br>(9.24)  | 0.356***<br>(16.32) | 0.016<br>(0.67)    | 0.091***<br>(4.71)   | 0.033<br>(1.75)      |
| 2020-06 × 80% ≤ σ ≤ 100% | 2.167***<br>(9.79)   | 2.433***<br>(9.93)  | 2.130***<br>(9.87)  | 0.897***<br>(6.84) | 1.492***<br>(8.68)   | 1.277***<br>(7.87)   |
| 2020-07 × 20% ≤ σ ≤ 80%  | 0.264***<br>(12.63)  | 0.385***<br>(13.25) | 0.451***<br>(20.64) | 0.058*<br>(2.42)   | 0.130***<br>(6.73)   | 0.114***<br>(5.94)   |
| 2020-07 × 80% ≤ σ ≤ 100% | 2.383***<br>(10.63)  | 2.747***<br>(11.10) | 2.359***<br>(10.61) | 0.979***<br>(7.59) | 1.551***<br>(8.28)   | 1.465***<br>(8.28)   |
| 2020-08 × 20% ≤ σ ≤ 80%  | 0.292***<br>(13.42)  | 0.402***<br>(13.48) | 0.488***<br>(21.71) | 0.122***<br>(5.32) | 0.108***<br>(5.36)   | 0.083***<br>(4.25)   |
| 2020-08 × 80% ≤ σ ≤ 100% | 2.394***<br>(10.37)  | 2.760***<br>(10.82) | 2.399***<br>(10.51) | 1.352***<br>(7.65) | 1.606***<br>(8.85)   | 1.577***<br>(9.31)   |
| 2020-09 × 20% ≤ σ ≤ 80%  | 0.284***<br>(12.64)  | 0.385***<br>(12.69) | 0.447***<br>(19.20) | 0.031<br>(1.28)    | 0.142***<br>(7.03)   | 0.118***<br>(5.71)   |
| 2020-09 × 80% ≤ σ ≤ 100% | 2.411***<br>(10.69)  | 2.739***<br>(11.13) | 2.409***<br>(10.79) | 1.111***<br>(7.56) | 1.672***<br>(9.10)   | 1.590***<br>(9.06)   |

|                                              |                      |                      |                      |                     |                      |                      |
|----------------------------------------------|----------------------|----------------------|----------------------|---------------------|----------------------|----------------------|
| 2020-10 $\times$ 20% $\leq \sigma \leq$ 80%  | 0.259***<br>(11.47)  | 0.341***<br>(11.26)  | 0.408***<br>(18.31)  | 0.035<br>(1.41)     | 0.150***<br>(7.59)   | 0.142***<br>(7.26)   |
| 2020-10 $\times$ 80% $\leq \sigma \leq$ 100% | 2.342***<br>(10.29)  | 2.695***<br>(10.94)  | 2.265***<br>(10.01)  | 1.165***<br>(7.91)  | 1.705***<br>(9.11)   | 1.614***<br>(9.23)   |
| 2020-11 $\times$ 20% $\leq \sigma \leq$ 80%  | 0.272***<br>(10.78)  | 0.360***<br>(10.42)  | 0.434***<br>(18.20)  | 0.113***<br>(4.77)  | 0.142***<br>(6.91)   | 0.119***<br>(5.79)   |
| 2020-11 $\times$ 80% $\leq \sigma \leq$ 100% | 2.387***<br>(10.52)  | 2.774***<br>(11.32)  | 2.298***<br>(10.27)  | 1.180***<br>(8.01)  | 1.537***<br>(8.12)   | 1.451***<br>(8.16)   |
| 2020-12 $\times$ 20% $\leq \sigma \leq$ 80%  | 0.284***<br>(11.42)  | 0.366***<br>(10.70)  | 0.411***<br>(17.14)  | 0.071**<br>(2.92)   | 0.130***<br>(6.09)   | 0.113***<br>(5.31)   |
| 2020-12 $\times$ 80% $\leq \sigma \leq$ 100% | 2.346***<br>(10.28)  | 2.745***<br>(11.01)  | 2.259***<br>(10.09)  | 1.626***<br>(9.27)  | 1.655***<br>(8.82)   | 1.588***<br>(8.98)   |
| Constant                                     | 2.715***<br>(226.07) | 3.598***<br>(256.29) | 1.968***<br>(181.82) | 0.690***<br>(85.95) | 1.636***<br>(160.07) | 1.401***<br>(145.25) |
| Observations                                 | 679,632              | 679,632              | 679,632              | 417,552             | 679,632              | 679,632              |
| MeSH Terms                                   | 28,318               | 28,318               | 28,318               | 17,398              | 28,318               | 28,318               |
| R2 within                                    | 0.103                | 0.063                | 0.061                | 0.108               | 0.057                | 0.095                |
| R2 between                                   | 0.001                | 0.000                | 0.002                | 0.001               | 0.001                | 0.001                |
| R2 overall                                   | 0.005                | 0.005                | 0.005                | 0.019               | 0.004                | 0.008                |

t statistics in parentheses, Std. Err. adjusted by MeSH-id. All outcome variables are in natural log.

\*  $p < 0.05$ , \*\*  $p < 0.01$ , \*\*\*  $p < 0.001$
